# Supplementary material for: Bycatch of Common Pollinators in Pheromone Baited Traps for Monitoring Corn Earworm (Lepidoptera: Noctuidae) in Missouri Industrial Hemp
Source: Preprints.org preprint supplement (doi:10.20944/preprints202401.0649.v1), 2024-01-08
Supplement: Supplementary file 1 [file supplementary]

**Table 1.** Mean (± SE) number of common bee species captured per sampling week in traps in 2021.

| Location | Trap Type | Carpenter Bee  Mean ± SE | Bumble Bee  Mean ± SE | Honey Bee  Mean ± SE |
| --- | --- | --- | --- | --- |
| Carver Farm | Green | 1.40 ± 0.53 ab | 1.27 ± 0.51 a | 1.07 ± 0.73 a |
| Clear | 0.47 ± 0.24 b | 0.33 ± 0.19 a | 0.60 ± 0.47 a |
| Tricolor | 4.27 ± 1.39 a | 2.27 ± 0.88 a | 1.93 ± 1.47 a |
| *χ2* | *9.12* | *5.38* | *0.33* |
| *df* | *2, 44* | *2, 44* | *2, 44* |
| *p* | *0.0104* | *0.0679* | *0.8473* |
| Sikeston | Green | 0.58 ± 0.26 b | 1.33 ± 0.61 b | 1.33 ± 0.45 a |
| Clear | 1.08 ± 0.34 b | 2.92 ± 0.94 b | 1.25 ± 0.49 a |
| Tricolor | 4.08 ± 1.08 a | 14.92 ± 4.67 a | 1.83 ± 0.58 a |
| *χ2* | *9.15* | *9.75* | *0.69* |
| *df* | *2, 33* | *2, 33* | *2, 33* |
| *p* | *0.0103* | *0.0076* | *0.7091* |

Means followed by different letters in the same column are significantly different at *p* = 0.05. Means followed by the same letter within each column are not significantly different (*P* > 0.05, Chi-square approximation).

**Table 2.** Mean total (± SE) number of bees captured in traps baited with *H. zea* lures in two locations in 2022.

| **Trap Type** | ***H. zea*** | |
| --- | --- | --- |
| **Carver Farm** | **Sikeston Farm** |
| Green | 11.00 ± 2.08 b | 10.67 ± 2.33 b |
| Clear | 8.3 ± 2.70 b | 2.67 ± 0.89 b |
| Tricolor | 134.6 ± 56.2 a | 31.67 ± 1.8 a |
| HS | 14.0 ± 2.73 b | NA |
| SD-1X | 16.33 ± 4.9 b | 22.00 ± 6.5 ab |
| *χ2* | *8.8* | *8.00* |
| *df* | *4* | *3* |
| *P* | *0.064* | *0.0459* |

Means followed by the same letter within each column are not significantly different (*P* > 0.05, Chi-square approximation). HS is the Heliothis Scentry trap and SD-1X is Scentry Delta trap.
